# Supplementary material for: Influence of the fused hetero-aromatic centers on molecular conformation and photovoltaic performance of solution-processed organic solar cells
Source: Royal Society of Chemistry journal article supplement (doi:10.1039/c4nj01617c), 2015-01-01

## **Supplementary data**

### **Influence of the fused hetero-aromatic centers on molecular conformation and photovoltaic performance of solution-processed organic solar cells**

**Dongfeng Dang, Jiang Fan, Xiangdong Wang, Manjun Xiao, Junwei Shi, Pei Zhou,  
Xiongwei Duan, Gangtie Lei, Yu Liu,\* Weiguo Zhu\***

Department of Chemistry, Key Lab of Environment-Friendly Chemistry and Application  
in the Ministry of Education, Xiangtan University, Xiangtan 411105, P. R. China

Corresponding author: Prof. Weiguo Zhu and Yu Liu

Tel: +86-731-58293377

Fax: +86-731-58292251

E-mail addresses: [zhuwg18@126.com](mailto:zhuwg18@126.com)

## Content

**Fig. S1.** The electron-density contribution of the HOMO and LUMO of FT1 and FT2.

**Fig. S2.** The presumed packing mode for FT1 and FT2.

**Fig. S3.** UV–Vis absorption spectra of FT1 and FT2 in CHCl<sub>3</sub> with a concentration of  $6.4 \times 10^{-5}$ ,  $5.2 \times 10^{-5}$  M, respectively.

**Fig. S4.** Current density-voltage characteristics of the FT1- and FT2-based OSCs device at varied blend ratios to PC<sub>71</sub>BM.

**Fig. S5.** The NMR and MS spectra for FT1 and FT2.

**Fig. S1. The electron-density contribution of the HOMO and LUMO of**

**FT1 and FT2**

**HOMO of FT1**

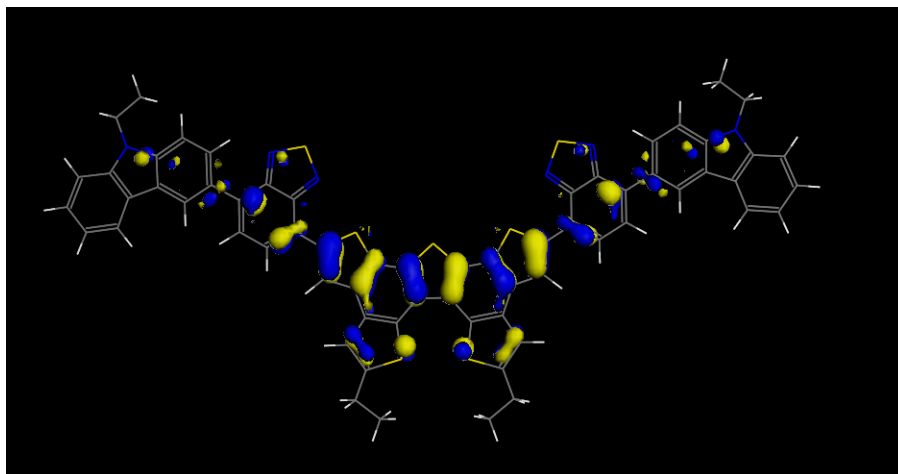

**LUMO of FT1**

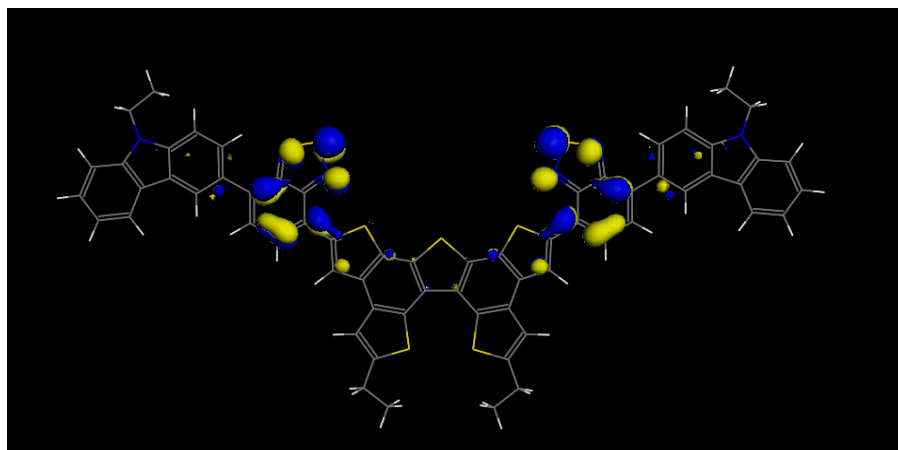

**HOMO of FT2**

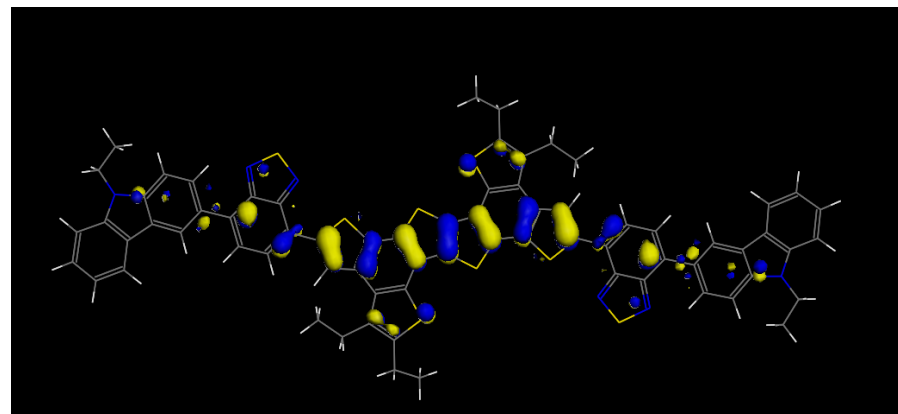

### LUMO of FT2

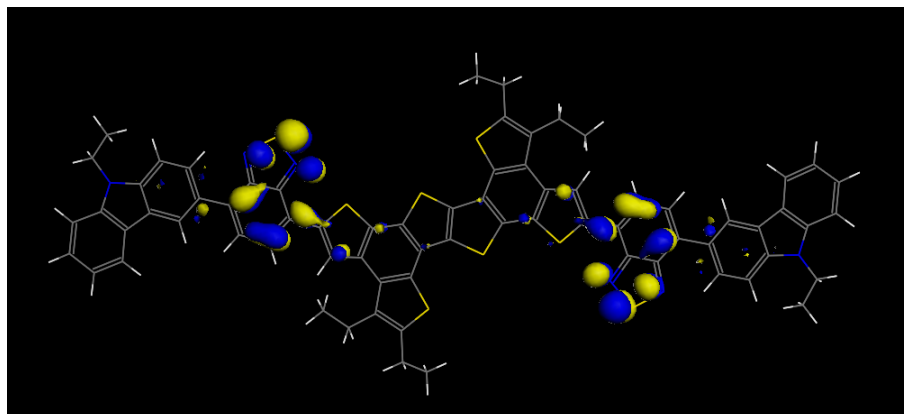

**Fig. S2. The presumed packing mode for FT1 and FT2**

### FT1

Unfavorable mode

Favorable mode

### FT2

General mode

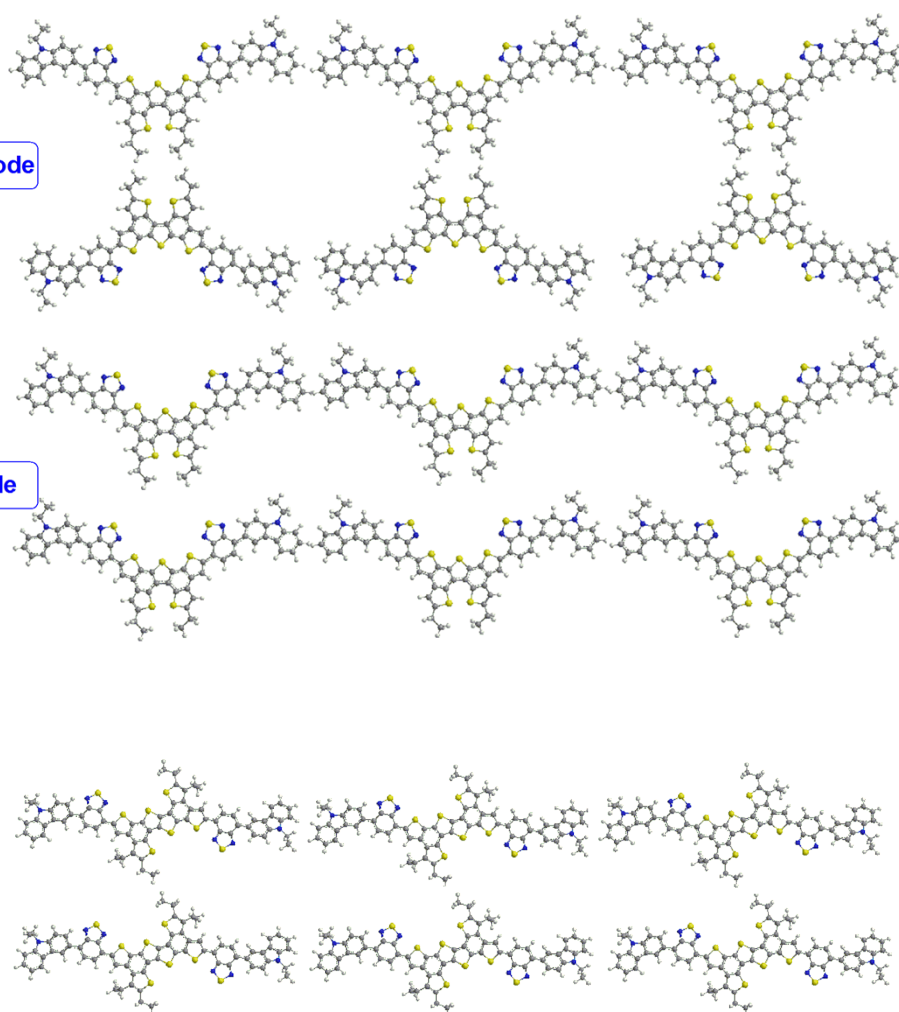

**Fig. S3. UV–Vis absorption spectra of FT1 and FT2 in CHCl<sub>3</sub> with a concentration of  $6.4 \times 10^{-5}$ ,  $5.2 \times 10^{-5}$  M, respectively.**

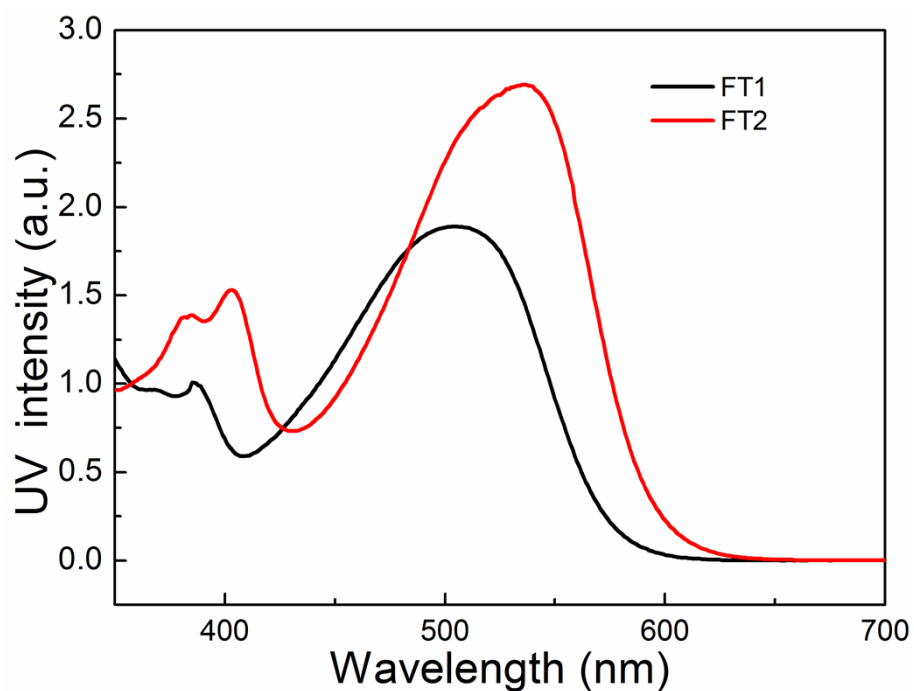

**Fig. S4. Current density-voltage characteristics of the FT1- and FT2-based OSCs at varied blend ratios to PC<sub>71</sub>BM**

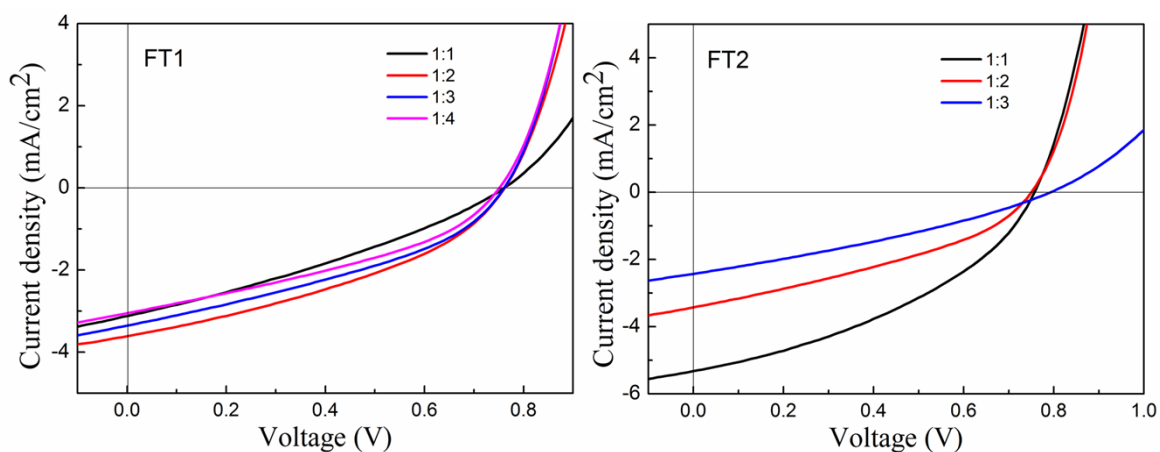

**Fig. S5. The NMR and MS for FT1 and FT2**

**NMR Spectra**

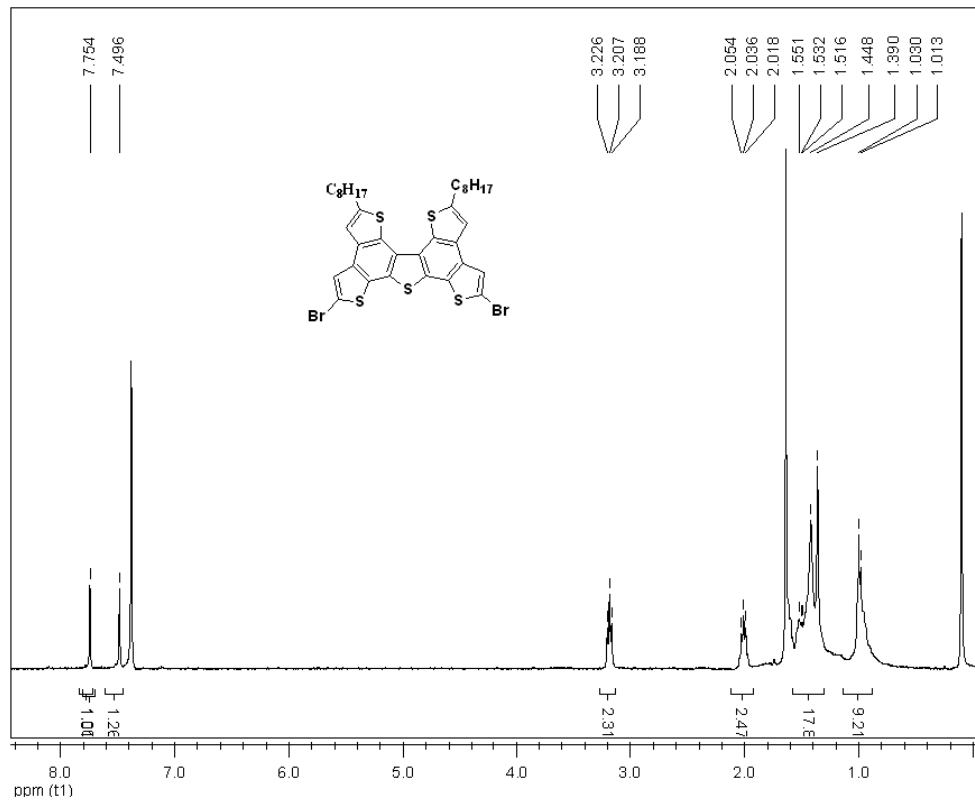

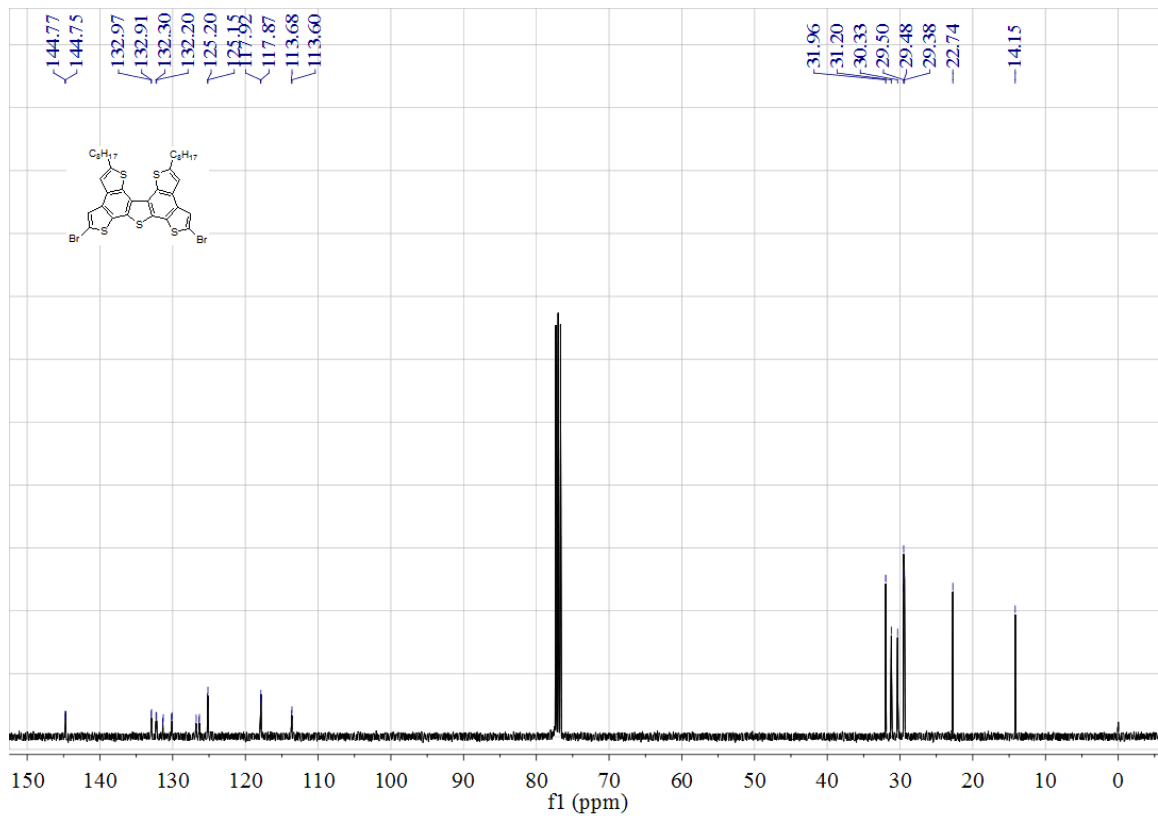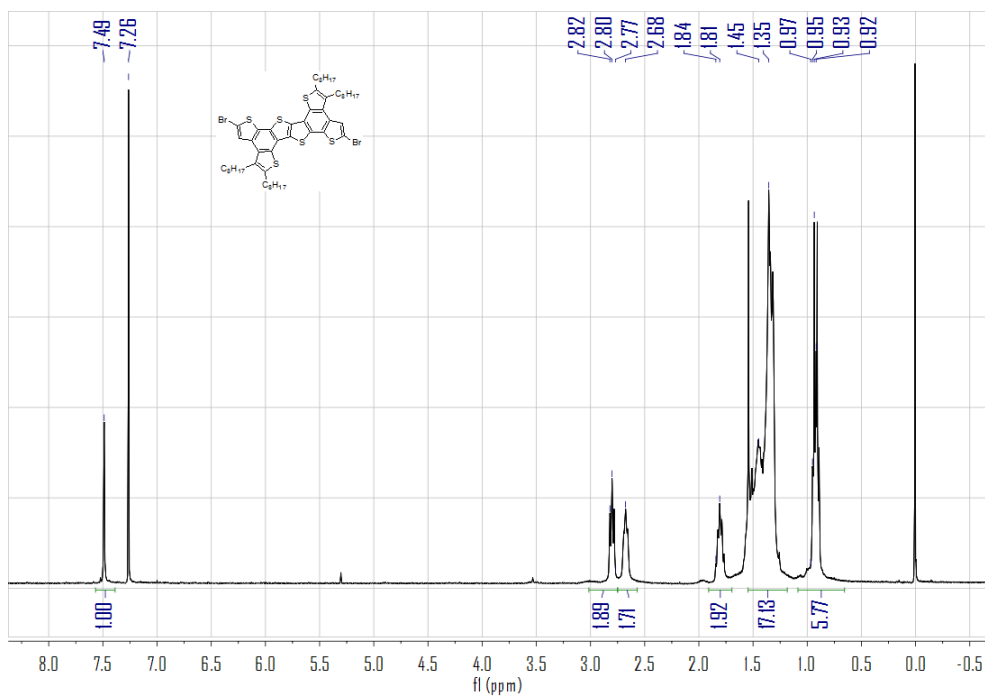

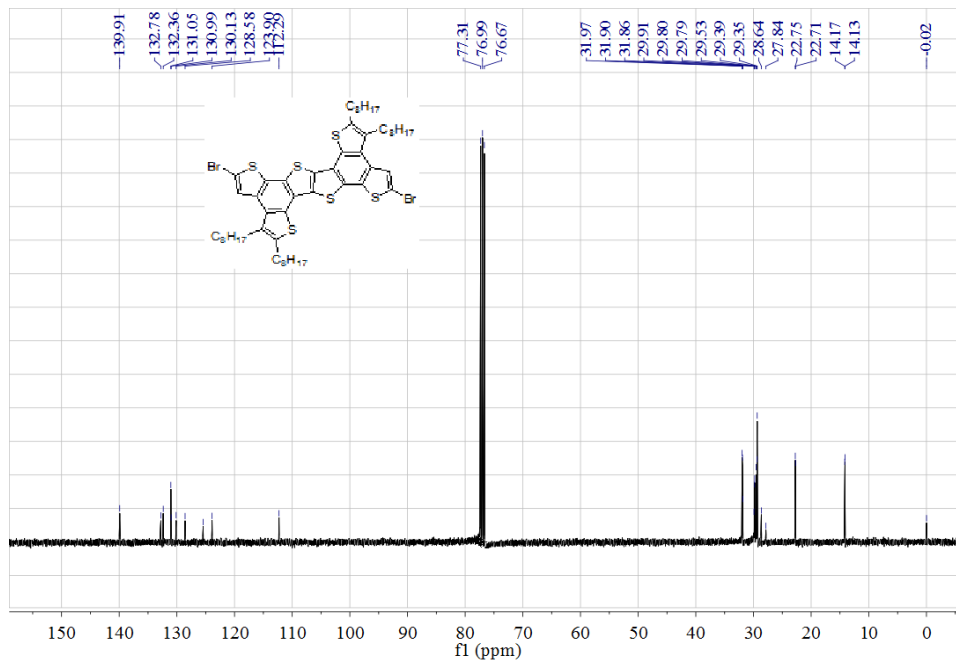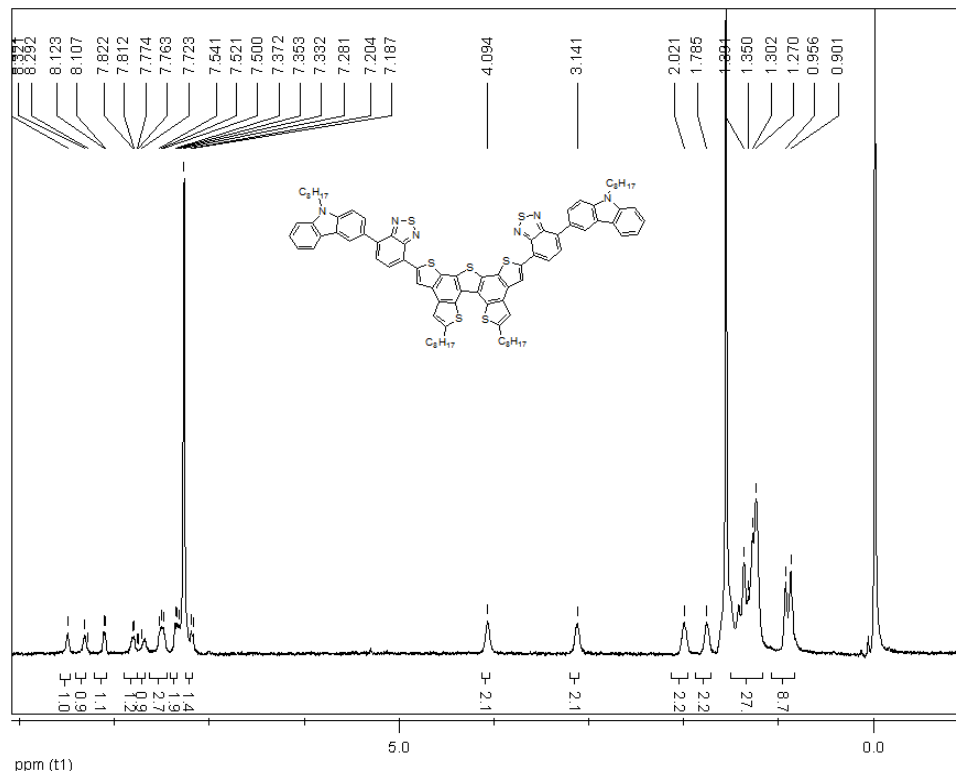



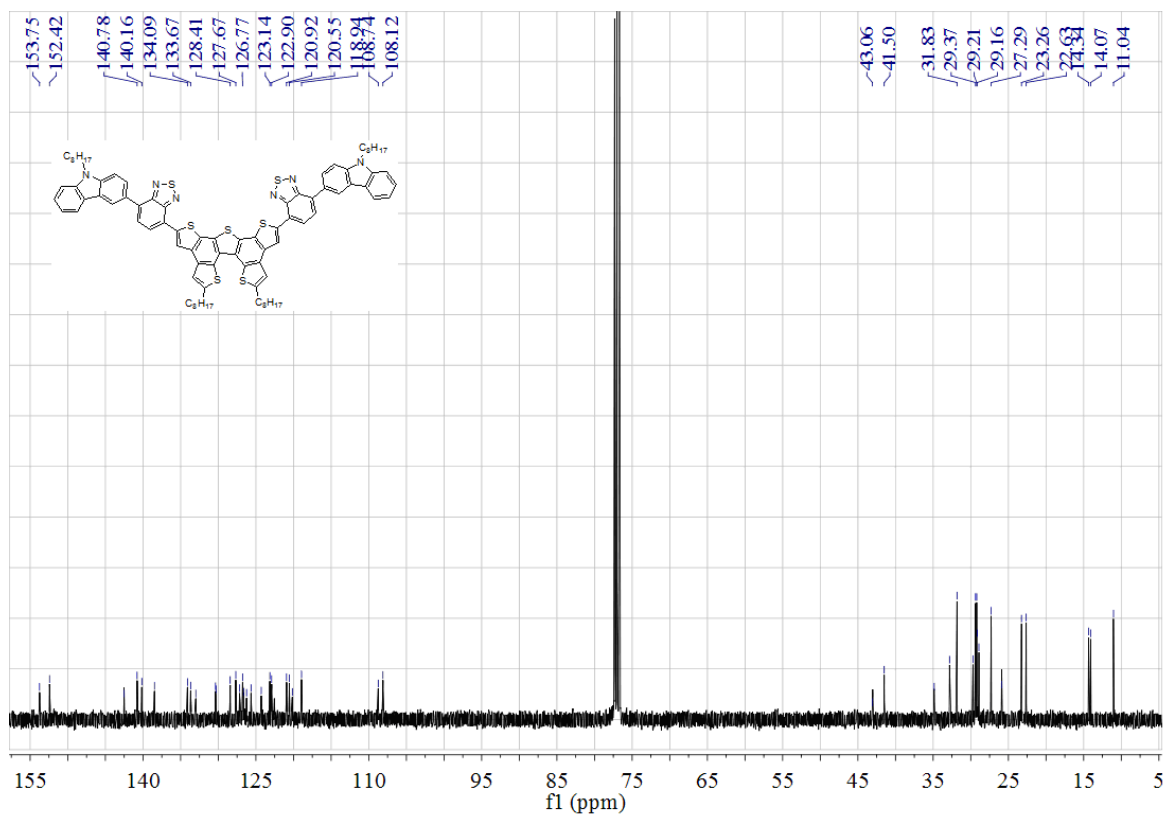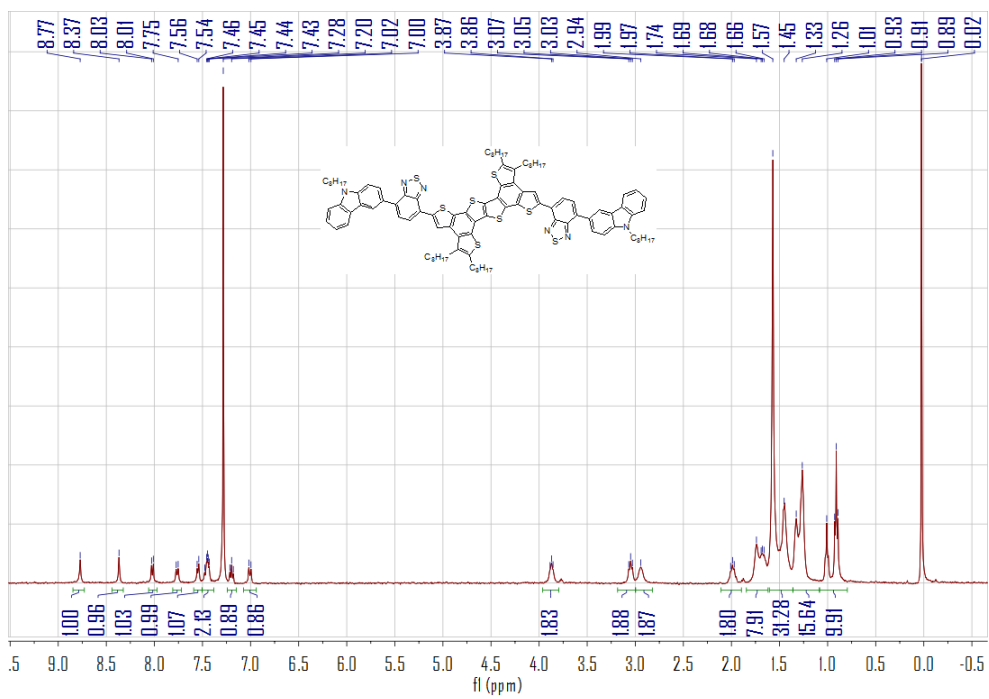

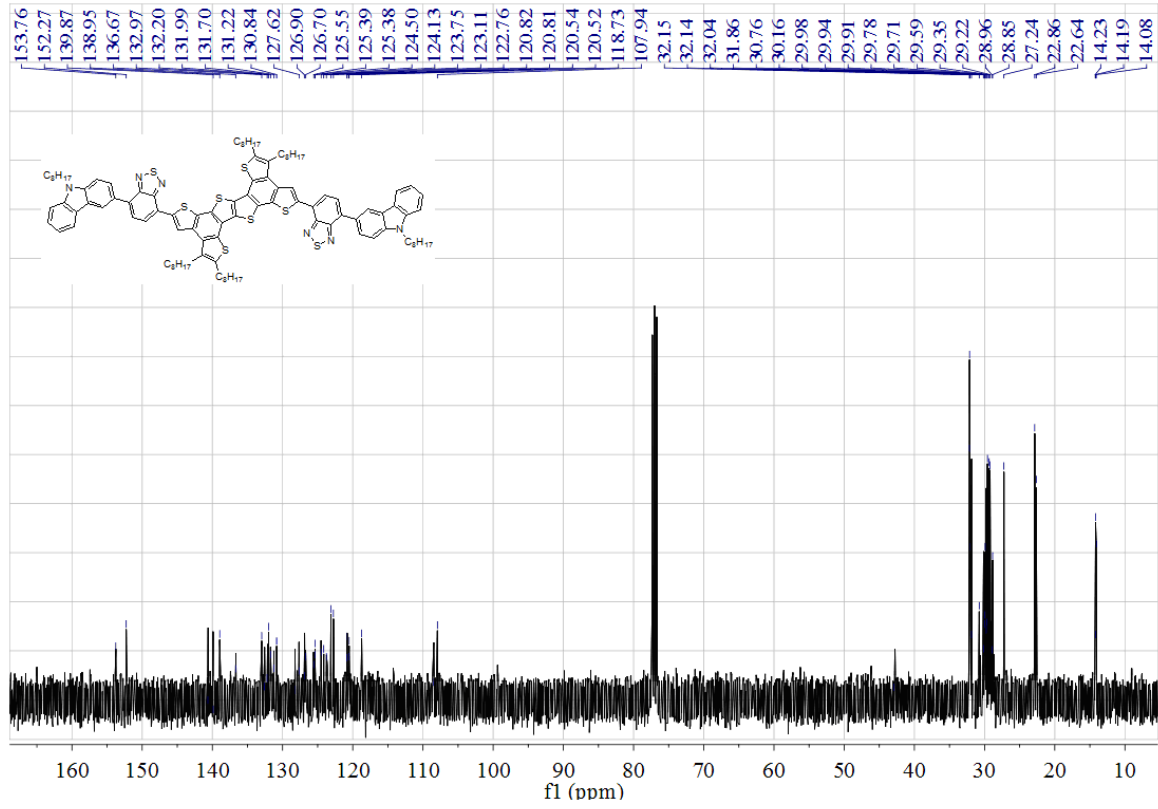

### MS spectra

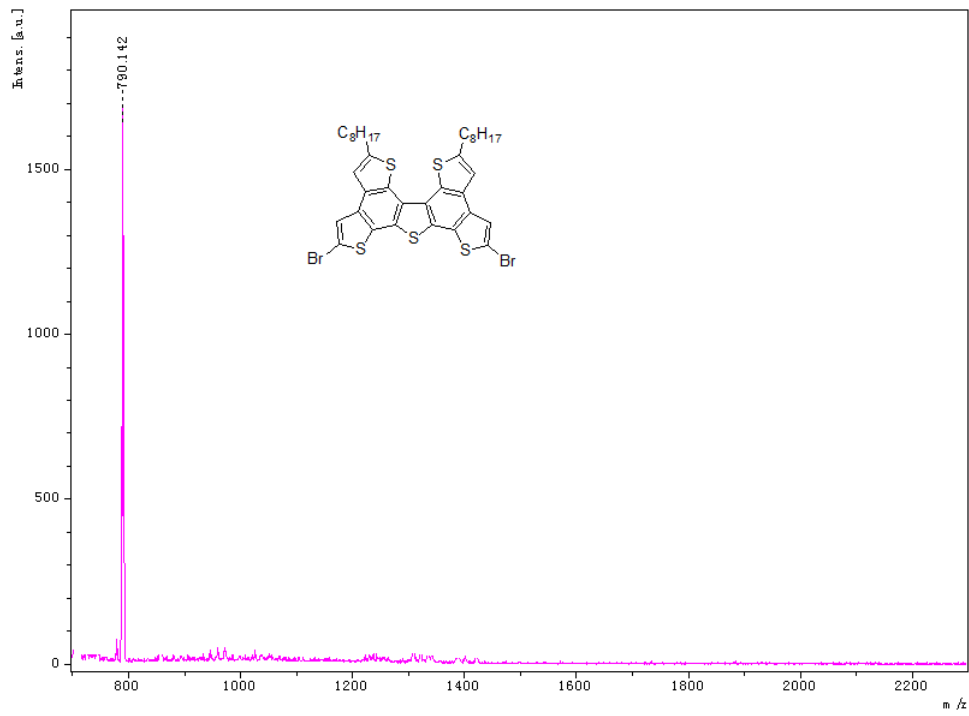

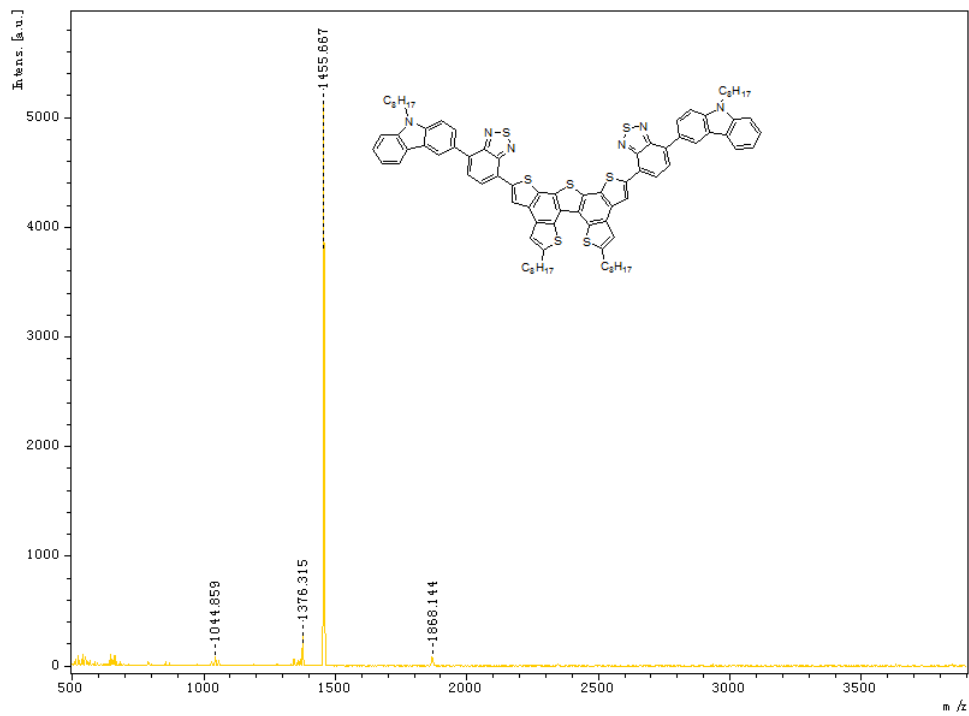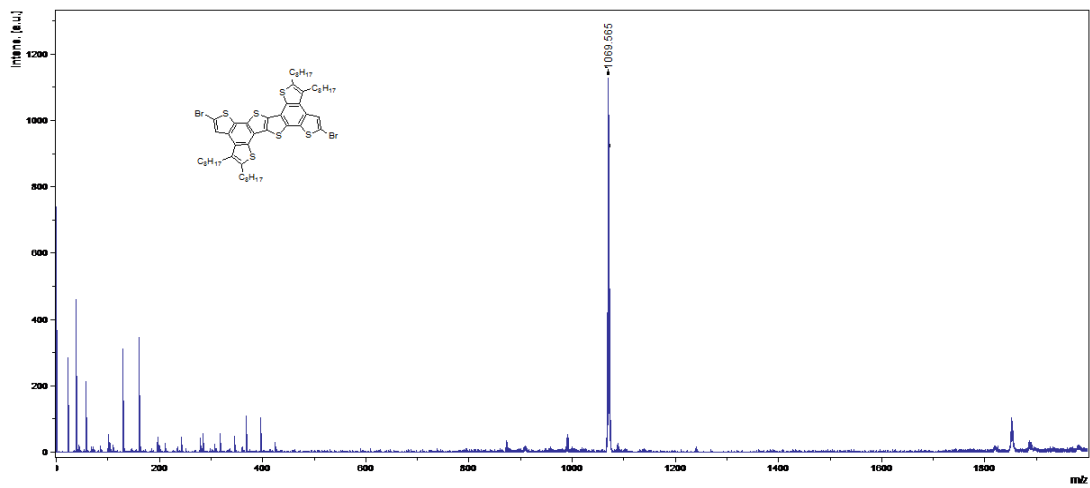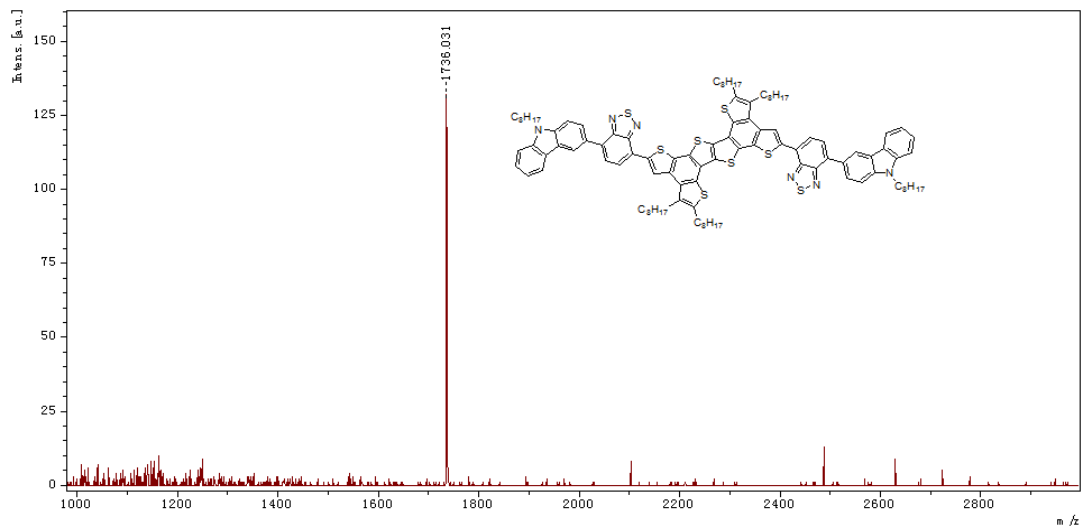

Supplement: c4nj01617c1.pdf [file c4nj01617c1.pdf]
